# Supplementary material
Source: PubMed Central journal article supplement (PMC6193758)
Supplement: NIHMS991954-supplement-1.pdf [file NIHMS991954-supplement-1.pdf]

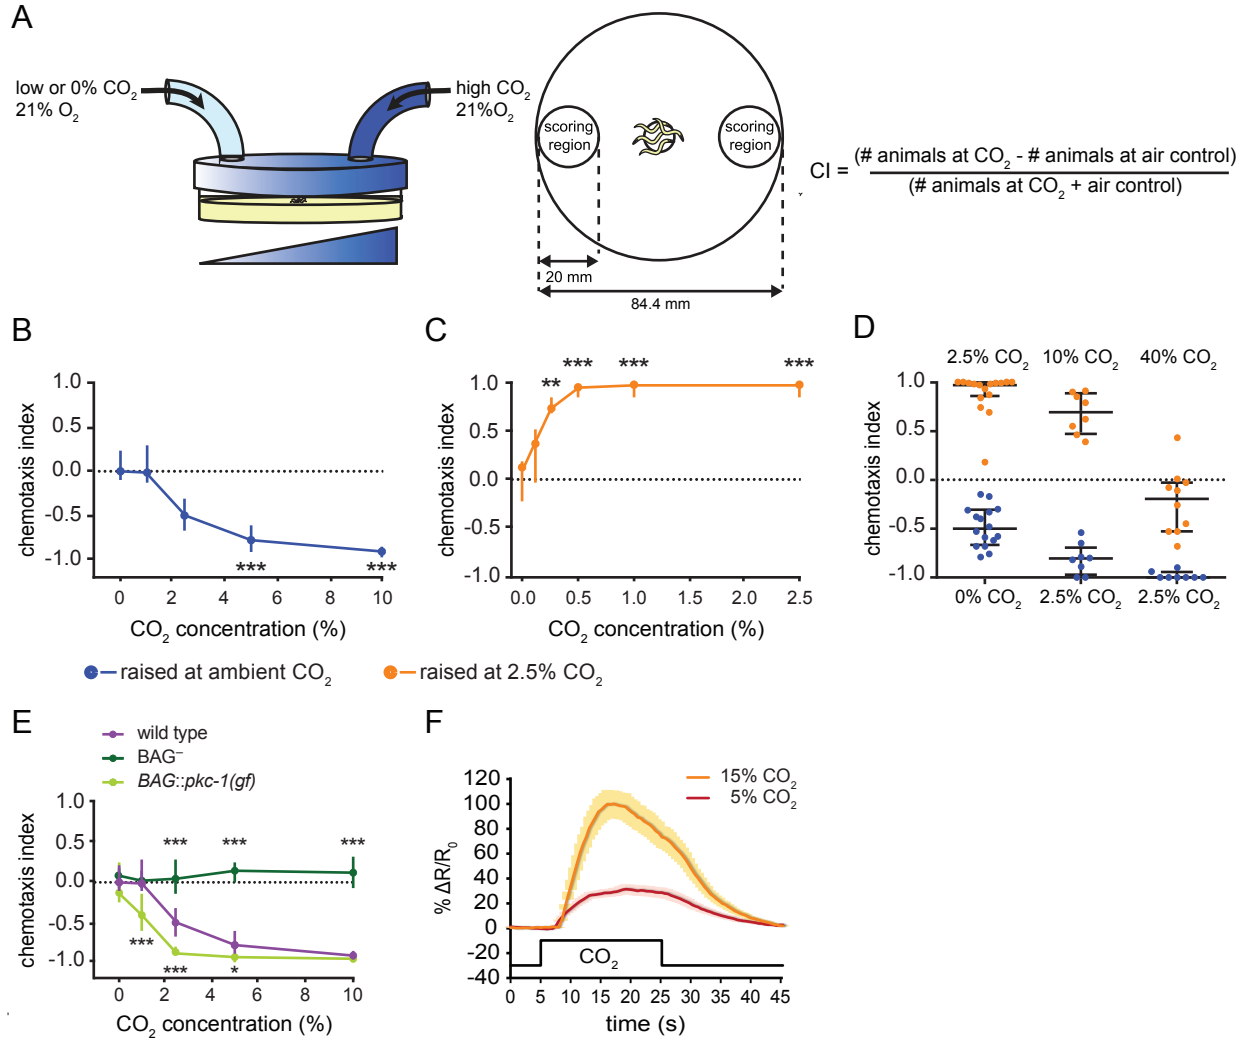

**Figure S1. Related to Figure 1. CO<sub>2</sub> response in *C. elegans* is experience-dependent.** (A) Schematic of the chemotaxis assay. Animals were placed in the center of a 100-mm agar plate (84.4-mm inside base diameter). A CO<sub>2</sub> gradient was established by delivering gas stimuli through holes on either side of the plate. At the end of the assay, the number of animals in a 20-mm diameter circle centered under each hole was counted and used to determine the chemotaxis index (CI) according to the formula shown above. (B-C) Animals raised at ambient CO<sub>2</sub> avoid CO<sub>2</sub> across concentrations (B), while animals raised at 2.5% CO<sub>2</sub> are attracted to CO<sub>2</sub> across concentrations (C). \*\**p*<0.01, \*\*\**p*<0.001, Kruskal-Wallis test with Dunn's post-test. For each graph, significance was determined relative to the 0% CO<sub>2</sub> condition. *n*=8-20 trials per condition. (D) Animals raised at either ambient or high (2.5%) CO<sub>2</sub> were tested in 0-2.5% (left), 2.5-10% (middle), or 2.5-40% (right) CO<sub>2</sub> gradients. Animals grown at ambient CO<sub>2</sub> migrate toward the lower CO<sub>2</sub> concentration. Animals grown at high CO<sub>2</sub> are attracted to the higher CO<sub>2</sub> concentration when tested in a 0-2.5% or 2.5-10% CO<sub>2</sub> gradient, but not when tested in a 2.5-40% CO<sub>2</sub> gradient. *n*=8-16 trials per condition. (E) BAG activity regulates behavioral sensitivity to CO<sub>2</sub>. In animals raised at ambient CO<sub>2</sub>, genetic ablation of the BAG neurons (BAG<sup>-/-</sup>) eliminates CO<sub>2</sub> avoidance across concentrations. By contrast, animals with more active BAG neurons due to BAG-specific expression of *pkc-1(gf)* show enhanced CO<sub>2</sub> avoidance. \**p*<0.05, \*\*\**p*<0.001, two-way ANOVA with Dunnett's post-test. *n*=8-16 trials per condition. For B-E, graphs depict medians with interquartile ranges. (F) The BAG response to CO<sub>2</sub> is concentration-dependent. Graph shows the calcium responses of BAG neurons to 15% CO<sub>2</sub> (orange) or 5% CO<sub>2</sub> (red), for animals raised at high (2.5%) CO<sub>2</sub>, measured using the ratiometric calcium indicator yellow cameleon YC3.60. Solid lines indicate average calcium responses; shading represents SEM. Black line indicates the CO<sub>2</sub> pulse.

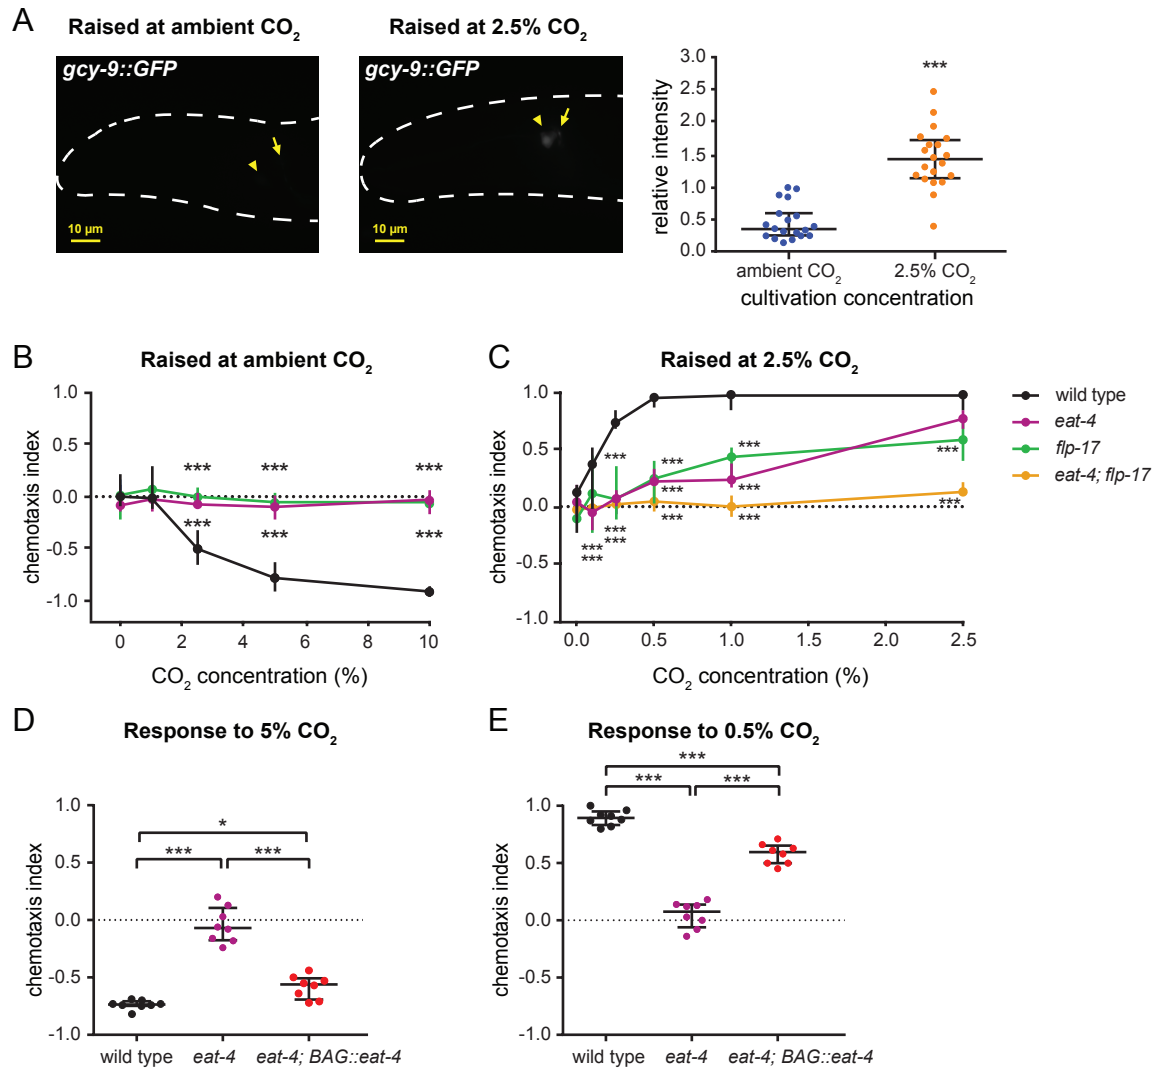

**Figure S2. Related to Figure 1. BAG neurons mediate both attractive and aversive CO<sub>2</sub> responses.** (A) Epifluorescence images of *gcy-9* expression in the BAG neurons of L4 animals raised at ambient CO<sub>2</sub> (left) or high (2.5%) CO<sub>2</sub> (middle). *gcy-9* expression was measured in animals containing a *gcy-9::GFP* transgene. Arrowheads indicate the location of the BAG neuron cell body; arrows indicate the location of the nerve ring. Anterior is to the left; dorsal is up. GFP expression is faint but detectable in animals raised at ambient CO<sub>2</sub>, and brighter in animals raised at high CO<sub>2</sub>. Graph (right) shows the relative intensity of expression of the *gcy-9::GFP* transgene in animals raised at ambient vs. high CO<sub>2</sub>. \*\*\**p*<0.001, unpaired t test. *n*=19-20 animals per condition. (B-C) *eat-4* and *flp-17* are required for normal CO<sub>2</sub> response. (B) Mutation of *eat-4* or *flp-17* abolishes CO<sub>2</sub> avoidance in animals raised at ambient CO<sub>2</sub>. \*\*\**p*<0.001, two-way ANOVA with Dunnett's post-test. *n*=6-16 trials per genotype and condition. (C) Mutation of either *eat-4* or *flp-17* reduces CO<sub>2</sub> attraction, and mutation of both genes abolishes CO<sub>2</sub> attraction, in animals raised at high (2.5%) CO<sub>2</sub>. \*\*\**p*<0.001, two-way ANOVA with Dunnett's post-test. *n*=8-26 trials per genotype and condition. (D-E) *eat-4* acts in the BAG neurons to mediate CO<sub>2</sub> avoidance and CO<sub>2</sub> attraction. Restoring *eat-4* expression specifically in the BAG neurons of *eat-4* mutants partially restores CO<sub>2</sub> avoidance (D) and attraction (E). Animals were raised at ambient CO<sub>2</sub> (D) or 2.5% CO<sub>2</sub> (E) and tested for their response to 5% CO<sub>2</sub> or 0.5% CO<sub>2</sub>, respectively. \**p*<0.05, \*\*\**p*<0.001, one-way ANOVA with Sidak's post-test. *n*=8 trials per genotype and condition. For A-E, graphs show medians with interquartile ranges.

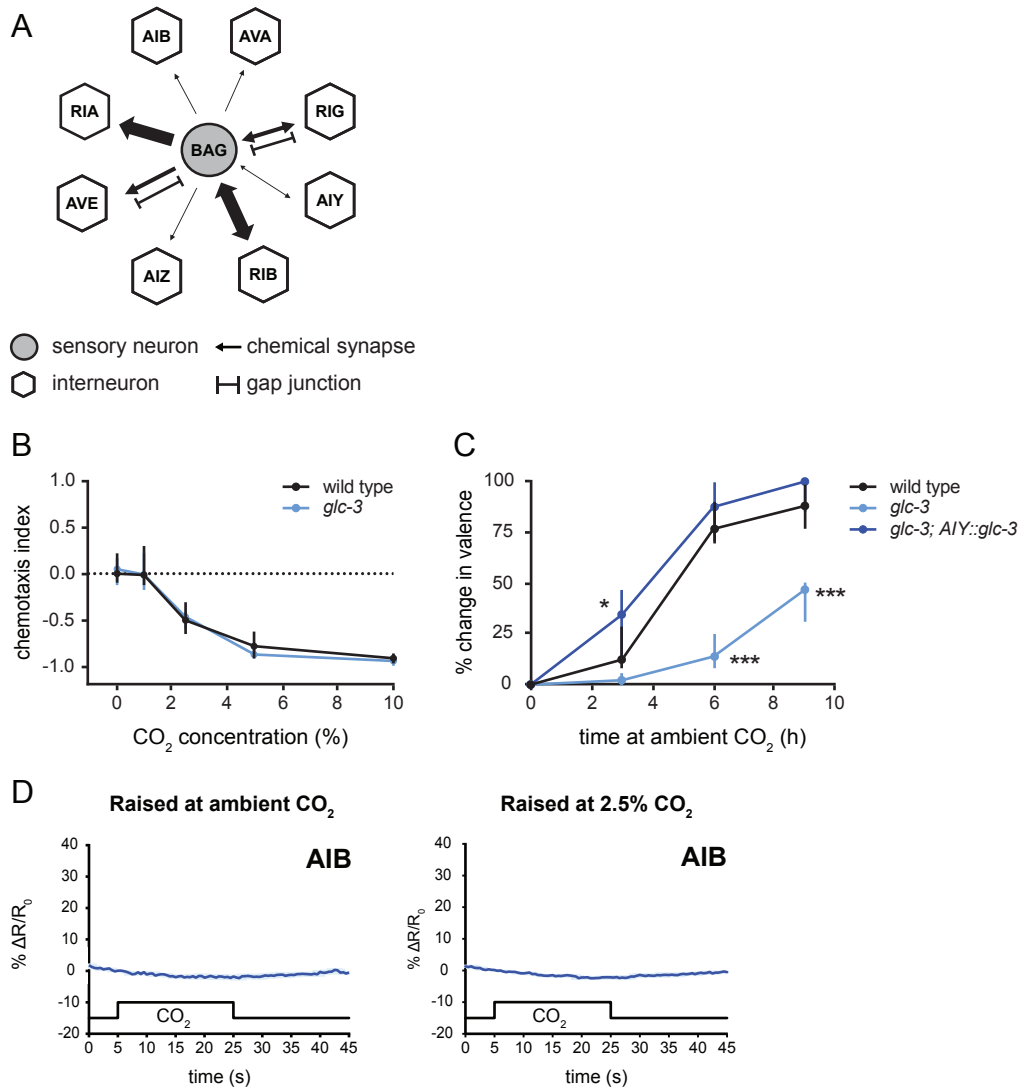

**Figure S3. Related to Figure 2, Figure 3 and Figure 4. Distinct interneurons regulate CO<sub>2</sub> avoidance and attraction.** (A) Structural connectivity of the CO<sub>2</sub>-detecting BAG neurons. Arrow thickness reflects the number of synaptic connections (1-2 synapses, 4-7 synapses, or 10+ synapses) from BAG to the downstream interneurons [S1, S2]. The interneurons shown have documented functions in other chemosensory microcircuits and were therefore investigated in this study. The BAG sensory neurons are also presynaptic to several other interneurons not shown. (B) *glc-3* mutants show normal CO<sub>2</sub> avoidance when raised at ambient CO<sub>2</sub>. (C) *glc-3* mutants show a delayed shift from CO<sub>2</sub> attraction to avoidance when raised at high (2.5%) CO<sub>2</sub> and transferred to ambient CO<sub>2</sub>. Restoring *glc-3* function specifically to AIY (*AIY::glc-3*) rescues the shift in CO<sub>2</sub> response valence. Animals were tested for their response to 2.5% CO<sub>2</sub>. Graph shows the percent change in valence as a function of time (see Methods). \**p*<0.05, \*\*\**p*<0.001, two-way ANOVA with Sidak's post-test (B) or two-way ANOVA with Dunnett's post-test (C). n=8-24 trials per genotype and condition. For B-C, graphs show medians with interquartile ranges. (D) AIB is not activated by CO<sub>2</sub> in animals raised at ambient CO<sub>2</sub> or high (2.5%) CO<sub>2</sub>. n=8 animals per genotype and condition. Calcium responses were measured using the ratiometric calcium indicators yellow cameleon YC3.60. Graphs show composite calcium responses to a 20-s pulse of 15% CO<sub>2</sub>. Solid lines indicate average calcium responses; shading represents SEM.

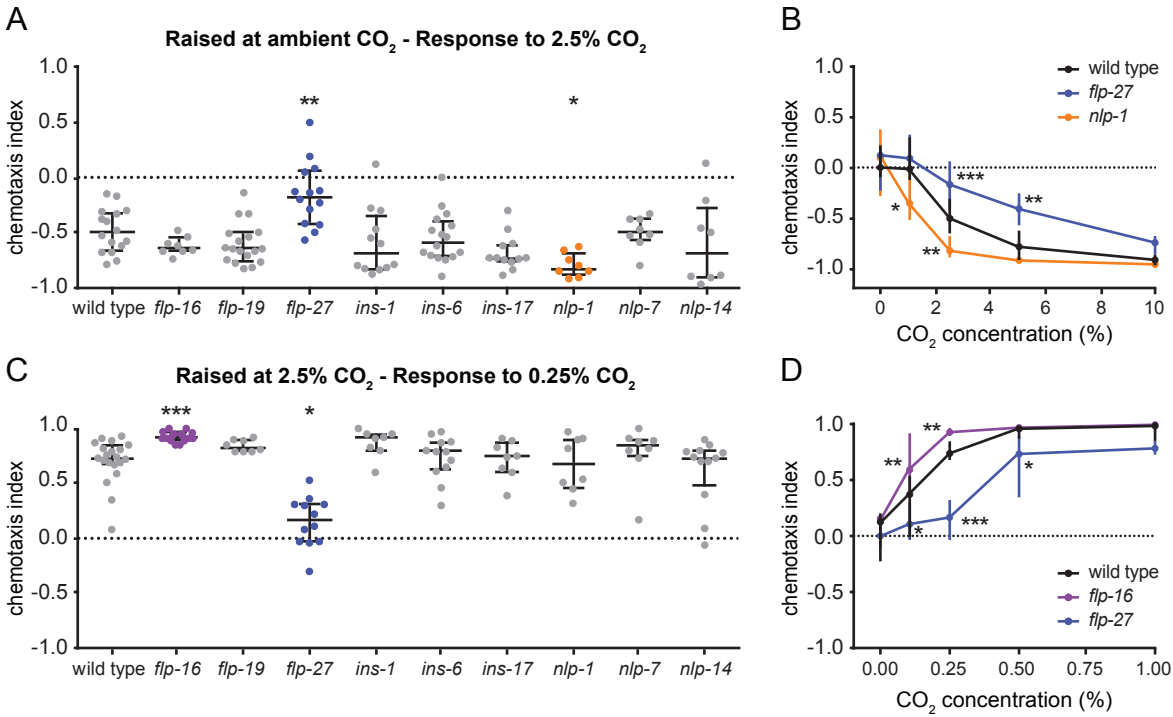

**Figure S4. Related to Figure 4. A combinatorial code of neuropeptides regulates CO<sub>2</sub> response valence and sensitivity.** (A-B) In animals raised at ambient CO<sub>2</sub>, *flp-27* mutants show reduced CO<sub>2</sub> avoidance and *nlp-1* mutants show enhanced CO<sub>2</sub> avoidance. Graphs show responses to 2.5% CO<sub>2</sub> (A) or across CO<sub>2</sub> concentrations (B). \* $p < 0.05$ , \*\* $p < 0.01$ , \*\*\* $p < 0.001$ , one-way ANOVA with Dunnett's post-test (A) or two-way ANOVA with Dunnett's post-test (B).  $n = 8-18$  trials per genotype and condition. (C-D) In animals raised at high (2.5%) CO<sub>2</sub>, *flp-16* mutants show enhanced CO<sub>2</sub> attraction and *flp-27* mutants show reduced attraction. Graphs show responses to 0.25% CO<sub>2</sub> (C) or across CO<sub>2</sub> concentrations (D). \* $p < 0.05$ , \*\* $p < 0.01$ , \*\*\* $p < 0.001$ , Kruskal-Wallis test with Dunn's post-test (C) or two-way ANOVA with Dunnett's post-test (D).  $n = 6-20$  trials per genotype and condition. For A-D, graphs show medians and interquartile ranges.

## Supplemental References

- S1. White, J.G., Southgate, E., Thomson, J.N., and Brenner, S. (1986). The structure of the nervous system of the nematode *Caenorhabditis elegans*. *Philos. Trans. R. Soc. Lond. B. Biol. Sci.* 314, 1-340.
- S2. Xu, M., Jarrell, T.A., Wang, Y., Cook, S.J., Hall, D.H., and Emmons, S.W. (2013). Computer assisted assembly of connectomes from electron micrographs: application to *Caenorhabditis elegans*. *PLoS One* 8, 1-6.
